# Supplementary material for: QTLs and Candidate Loci Associated with Drought Tolerance Traits of Kaybonnet x ZHE733 Recombinant Inbred Lines Rice Population
Source: MDPI journal article supplement (doi:10.3390/ijms242015167), 2023-10-14
Supplement: s1 [file s1]

**Table S3.** QTLs identified for morphological and yield traits under DS and WW conditions and root architectural traits under ABA conditions with IciMapping

| Trait name | QTLs             | Chromosome | LOD   | PVE (%) | Peak Marker | Position (cM) | Candidate gene position (bp) | Number of genes within 25 kb of the marker closest to the QTL peak | Gene annotation                                                                                                                                                 |
|------------|------------------|------------|-------|---------|-------------|---------------|------------------------------|--------------------------------------------------------------------|-----------------------------------------------------------------------------------------------------------------------------------------------------------------|
| PHC        | <i>qPHC1.1</i>   | 1          | 10.57 | 4.85    | KZ14152     | 43            | 38480787                     | 9                                                                  | Protein phosphorylation                                                                                                                                         |
| PHC        | <i>qPHC2.1</i>   | 2          | 24.42 | 13.81   | KZ23918     | 546           | 27023516                     | 7                                                                  | Transport.Major_Intrinsic_P proteins.PIP                                                                                                                        |
| PHC        | <i>qPHC2.2</i>   | 2          | 17.19 | 8.63    | KZ24204     | 552           | 29443430                     | 11                                                                 | Protein phosphorylation                                                                                                                                         |
| RL_ABA3    | <i>qRLA3-2.3</i> | 2          | 28.85 | 0.61    | KZ24639     | 236           | 33179587                     | 5                                                                  | Stress.abiotic.heat                                                                                                                                             |
| RL_ABA5    | <i>qRLA5-2.2</i> | 2          | 20.72 | 0.59    |             |               |                              |                                                                    |                                                                                                                                                                 |
| TPBD       | <i>qTPBD3.1</i>  | 3          | 10.57 | 6.48    | KZ35574     | 19            | 32079708                     | 6                                                                  | Signaling.receptor_kinases.lucine_rich_repeat_XI                                                                                                                |
| RL_ABA3    | <i>qRLA3-3.1</i> | 3          | 32.94 | 0.61    |             |               |                              |                                                                    |                                                                                                                                                                 |
| RL_ABA5    | <i>qRLA5-3.1</i> | 3          | 24.79 | 0.59    |             |               |                              |                                                                    |                                                                                                                                                                 |
| PPBC       | <i>qPPBC4.1</i>  | 4          | 4.73  | 10.34   | KZ44474     | 137           | 436771                       | 7                                                                  | PS.photorespiration.hydroxy pyruvate_reductase                                                                                                                  |
| TPBC       | <i>qTPBC4.2</i>  | 4          | 3.58  | 2.78    | KZ45735     | 226           | 26174168                     | 7                                                                  | PS.lightreaction.photosystem_II.PSII_polypeptide_sub units                                                                                                      |
| RL_ABA3    | <i>qRLA3-4.2</i> | 4          | 22.34 | 0.61    |             |               |                              |                                                                    |                                                                                                                                                                 |
| RL_ABA5    | <i>qRLA5-4.2</i> | 4          | 14.21 | 0.59    |             |               |                              |                                                                    |                                                                                                                                                                 |
| PLD        | <i>qPLD4.2</i>   | 4          | 2.70  | 6.08    | KZ44511     | 286           | 1233282                      | 7                                                                  | ERF domain containing protein. (Os04t0649100-02);APETALA2 transcription factor, Seed shattering through abscission zone (AZ) development (Os04t0649100-03)      |
| FGC        | <i>qFGC5.1</i>   | 5          | 5.74  | 1.12    | KZ57234     | 481           | 28101481                     | 12                                                                 | Drought-responsive ethylene response factor 10, drought-responsive ERF 10, ethylene response factor 84, APETALA2/ethylene-responsive element binding protein 97 |
| FGD        | <i>qFGD5.1</i>   | 5          | 2.53  | 4.74    |             |               |                              |                                                                    |                                                                                                                                                                 |
| RL_ABA3    | <i>qRLA3-5.1</i> | 5          | 25.08 | 0.61    |             |               |                              |                                                                    |                                                                                                                                                                 |
| RL_ABA5    | <i>qRLA5-5.1</i> | 5          | 16.95 | 0.59    |             |               |                              |                                                                    |                                                                                                                                                                 |

**Table S3.** QTLs identified for morphological and yield traits under DS and WW conditions and root architectural traits under ABA conditions with IciMapping (Continued)

| Trait name | QTLs             | Chromosome | LOD   | PVE (%) | Peak Marker | Position (cM) | Candidate gene position (bp) | Number of genes within 25 kb of the marker closest to the QTL peak | Gene annotation                                                                                                                                              |
|------------|------------------|------------|-------|---------|-------------|---------------|------------------------------|--------------------------------------------------------------------|--------------------------------------------------------------------------------------------------------------------------------------------------------------|
| FGC        | <i>qFGC6.2</i>   | 6          | 3.71  | 0.87    | KZ68491     | 230           | 29755505                     | 9                                                                  | Control of rice architecture via BR signaling (Os06t0704300-01)_Tetrapyrrole biosynthetic process                                                            |
| TPBC       | <i>qTPBC6.2</i>  | 6          | 3.01  | 2.66    |             |               |                              |                                                                    |                                                                                                                                                              |
| RL_ABA3    | <i>qRLA3-6.1</i> | 6          | 26.24 | 0.61    |             |               |                              |                                                                    |                                                                                                                                                              |
| RL_ABA5    | <i>qRLA5-6.1</i> | 6          | 18.12 | 0.59    |             |               |                              |                                                                    |                                                                                                                                                              |
| FGC        | <i>qFGC7.1</i>   | 7          | 3.06  | 1.27    | KZ79333     | 283           | 28219138                     | 10                                                                 | Lipid_metabolism.lipid_degradation.lipases                                                                                                                   |
| SPC        | <i>qSPC7.1</i>   | 7          | 2.58  | 9.88    |             |               |                              |                                                                    |                                                                                                                                                              |
| SPC        | <i>qSPC7.2</i>   | 7          | 4.62  | 6.37    | KZ79821     | 91            | 9822937                      | 7                                                                  | Protein of unknown function DUF594 domain containing protein. (Os07t0269400-00)                                                                              |
| SPD        | <i>qSPD7.1</i>   | 7          | 4.85  | 2.12    | KZ77844     | 265           | 912849                       | 9                                                                  | Stress biotic_Endoplasmic reticulum protein, Regulation of sugar partitioning in carbon-demanding young leaves and developing leaf sheaths (Os07t0116300-01) |
| PLC        | <i>qPLC7.1</i>   | 7          | 5.05  | 9.62    | KZ78019     | 107           | 11608339                     | 13                                                                 | Regulation of nutrient metabolism and endosperm development (Os07t0296900-01)                                                                                |
| PPBC       | <i>qPPBC7.1</i>  | 7          | 2.91  | 6.27    |             |               |                              |                                                                    |                                                                                                                                                              |
| SPC        | <i>qSPC8.1</i>   | 8          | 3.40  | 5.75    | KZ90034     | 115           | 26147631                     | 11                                                                 | Embryo and endosperm development (Os08t0525500-01)_carbohydrate metabolic process_UDP-glucuronic acid 4-epimerase 2                                          |
| PPBC       | <i>qPPBC8.1</i>  | 8          | 2.66  | 7.25    |             |               |                              |                                                                    |                                                                                                                                                              |
| FGD        | <i>qFGD8.1</i>   | 8          | 2.78  | 3.79    | KZ89547     | 357           | 3507836                      | 6                                                                  | RNA.processing.RNA_helicase_DEAD-box RNA helicase, Pre-mRNA splicing under cold stress (Os08t0159900-01)                                                     |
| RL_ABA3    | <i>qRLA3-8.1</i> | 8          | 24.48 | 0.61    |             |               |                              |                                                                    |                                                                                                                                                              |
| RL_ABA5    | <i>qRLA5-8.1</i> | 8          | 16.35 | 0.59    |             |               |                              |                                                                    |                                                                                                                                                              |

**Table S3.** QTLs identified for morphological and yield traits under DS and WW conditions and root architectural traits under ABA conditions with IciMapping (Continued)

| Trait name | QTLs              | Chromosome | LOD   | PVE (%) | Peak Marker | Position (cM) | Candidate gene position (bp) | Number of genes within 25 kb of the marker closest to the QTL peak | Gene annotation                                                                                     |
|------------|-------------------|------------|-------|---------|-------------|---------------|------------------------------|--------------------------------------------------------------------|-----------------------------------------------------------------------------------------------------|
| TPBD       | <i>qTPBD9.1</i>   | 9          | 3.37  | 2.24    | KZ101571    | 341           | 4220164                      | 7                                                                  | Carbohydrate metabolic process (GO:0005975)                                                         |
| RL_ABA5    | <i>qRLA5-9.1</i>  | 9          | 13.57 | 0.59    |             |               |                              |                                                                    |                                                                                                     |
| SPD        | <i>qSPD10.1</i>   | 10         | 3.03  | 0.98    | KZ102164    | 300           | 12048509                     | 6                                                                  | Intracellular protein transport (GO:0006886)                                                        |
| RL_ABA3    | <i>qRLA3-10.1</i> | 10         | 20.11 | 0.61    |             |               |                              |                                                                    |                                                                                                     |
| TPBC       | <i>qTPBC10.1</i>  | 10         | 7.25  | 5.09    | KZ102869    | 112           | 3205210                      | 10                                                                 | RNA.transcription                                                                                   |
| TPBD       | <i>qTPBD10.2</i>  | 10         | 6.71  | 4.31    | KZ102866    | 118           | 3156402                      | 5                                                                  | MYB transcription factor                                                                            |
| RL_ABA3    | <i>qRLA3-10.3</i> | 10         | 23.86 | 0.61    |             |               |                              |                                                                    |                                                                                                     |
| TPBD       | <i>qTPBD10.3</i>  | 10         | 21.82 | 8.49    | KZ102900    | 302           | 3719254                      | 10                                                                 | Similar to Chalcone and stilbene synthases, N-terminal domain containing protein. (Os10t0158400-00) |
| TPBD       | <i>qTPBD12.2</i>  | 12         | 3.19  | 6.34    | KZ105668    | 412           | 953389                       | 10                                                                 | Late embryogenesis abundant protein, LEA-14 (IPR004864)                                             |
