# Supplementary material for: QTLs and Candidate Loci Associated with Drought Tolerance Traits of Kaybonnet x ZHE733 Recombinant Inbred Lines Rice Population
Source: MDPI journal article supplement (doi:10.3390/ijms242015167), 2023-10-14
Supplement: s1 [file s1]

**Table S5.** Phenotypic correlation between grain yield components and morphological traits of the K/Z RIL population under WW & DS conditions

|               | HD     | FLW    | DLR    | PH-WW  | PH-DS  | TN-WW  | TN-DS  | SP-WW  | SP-DS  | PL-WW  | PL-DS  | PPB-WW | PPB-DS | FG-WW  | FG-DS  | TPB-WW |
|---------------|--------|--------|--------|--------|--------|--------|--------|--------|--------|--------|--------|--------|--------|--------|--------|--------|
| <b>FLW</b>    | -0.132 |        |        |        |        |        |        |        |        |        |        |        |        |        |        |        |
| <b>DLR</b>    | 0.078  | 0.067  |        |        |        |        |        |        |        |        |        |        |        |        |        |        |
| <b>PH-WW</b>  | -0.119 | -0.044 | -0.124 |        |        |        |        |        |        |        |        |        |        |        |        |        |
| <b>PH-DS</b>  | -0.154 | 0.282  | 0.078  | 0.315  |        |        |        |        |        |        |        |        |        |        |        |        |
| <b>TN-WW</b>  | 0.100  | 0.063  | -0.091 | -0.080 | -0.168 |        |        |        |        |        |        |        |        |        |        |        |
| <b>TN-DS</b>  | 0.071  | 0.021  | -0.096 | 0.039  | -0.170 | 0.466  |        |        |        |        |        |        |        |        |        |        |
| <b>SP-WW</b>  | 0.083  | -0.072 | 0.064  | 0.063  | -0.117 | 0.098  | 0.003  |        |        |        |        |        |        |        |        |        |
| <b>SP-DS</b>  | 0.129  | 0.040  | -0.025 | 0.003  | -0.027 | 0.178  | 0.037  | 0.537  |        |        |        |        |        |        |        |        |
| <b>PL-WW</b>  | -0.026 | -0.003 | 0.050  | 0.385  | 0.099  | -0.008 | -0.043 | 0.457  | 0.250  |        |        |        |        |        |        |        |
| <b>PL-DS</b>  | -0.061 | 0.214  | 0.000  | 0.088  | 0.277  | -0.043 | -0.112 | 0.045  | 0.399  | 0.121  |        |        |        |        |        |        |
| <b>PPB-WW</b> | 0.084  | -0.084 | 0.111  | 0.149  | 0.025  | 0.038  | -0.036 | 0.535  | 0.252  | 0.523  | 0.004  |        |        |        |        |        |
| <b>PPB-DS</b> | 0.063  | 0.240  | -0.079 | -0.010 | 0.050  | 0.052  | 0.021  | 0.166  | 0.513  | 0.056  | 0.621  | 0.063  |        |        |        |        |
| <b>FG-WW</b>  | 0.088  | 0.020  | 0.165  | 0.055  | 0.124  | 0.066  | -0.090 | 0.340  | 0.489  | 0.176  | -0.028 | 0.196  | -0.038 |        |        |        |
| <b>FG-DS</b>  | 0.029  | 0.064  | 0.114  | 0.041  | 0.125  | 0.085  | -0.078 | 0.284  | 0.471  | 0.153  | 0.026  | 0.132  | -0.043 | 0.888  |        |        |
| <b>TPB-WW</b> | -0.121 | 0.096  | -0.061 | -0.080 | -0.057 | 0.086  | 0.080  | -0.070 | -0.107 | -0.093 | -0.020 | -0.053 | 0.070  | -0.269 | -0.286 |        |
| <b>TPB-DS</b> | -0.054 | -0.056 | -0.099 | -0.062 | -0.097 | 0.077  | 0.019  | -0.079 | -0.074 | -0.108 | -0.073 | 0.027  | -0.031 | -0.169 | -0.203 | 0.632  |

\*HD, Heading day under WW and DS; FLW, Flag leaf width (cm); DLR, Drought leaf rolling under DS; PH-WW, Plant height (cm) under WW; PH-DS, Plant height (cm) under DS; TN-WW, Productive tiller number under WW; TN-DS, Productive tiller number under DS; SP-WW, Spikelet per panicle number under WW; SP-DS, Spikelet per panicle number under DS; PL-WW, Panicle length (cm) under WW; PL-DS, Panicle length (cm) under DS; PPB-WW, Primary panicle branch number under WW; PPB-DS, Primary panicle branch number under DS; FG-WW, Filled grain per panicle number under WW; FG-DS, Filled grain per panicle number under DS; TPB-WW, Total plant biomass (g) under WW; TPB-DS, Total plant biomass (g) under DS.
