# Supplementary material for: QTLs and Candidate Loci Associated with Drought Tolerance Traits of Kaybonnet x ZHE733 Recombinant Inbred Lines Rice Population
Source: MDPI journal article supplement (doi:10.3390/ijms242015167), 2023-10-14
Supplement: s1 [file s1]

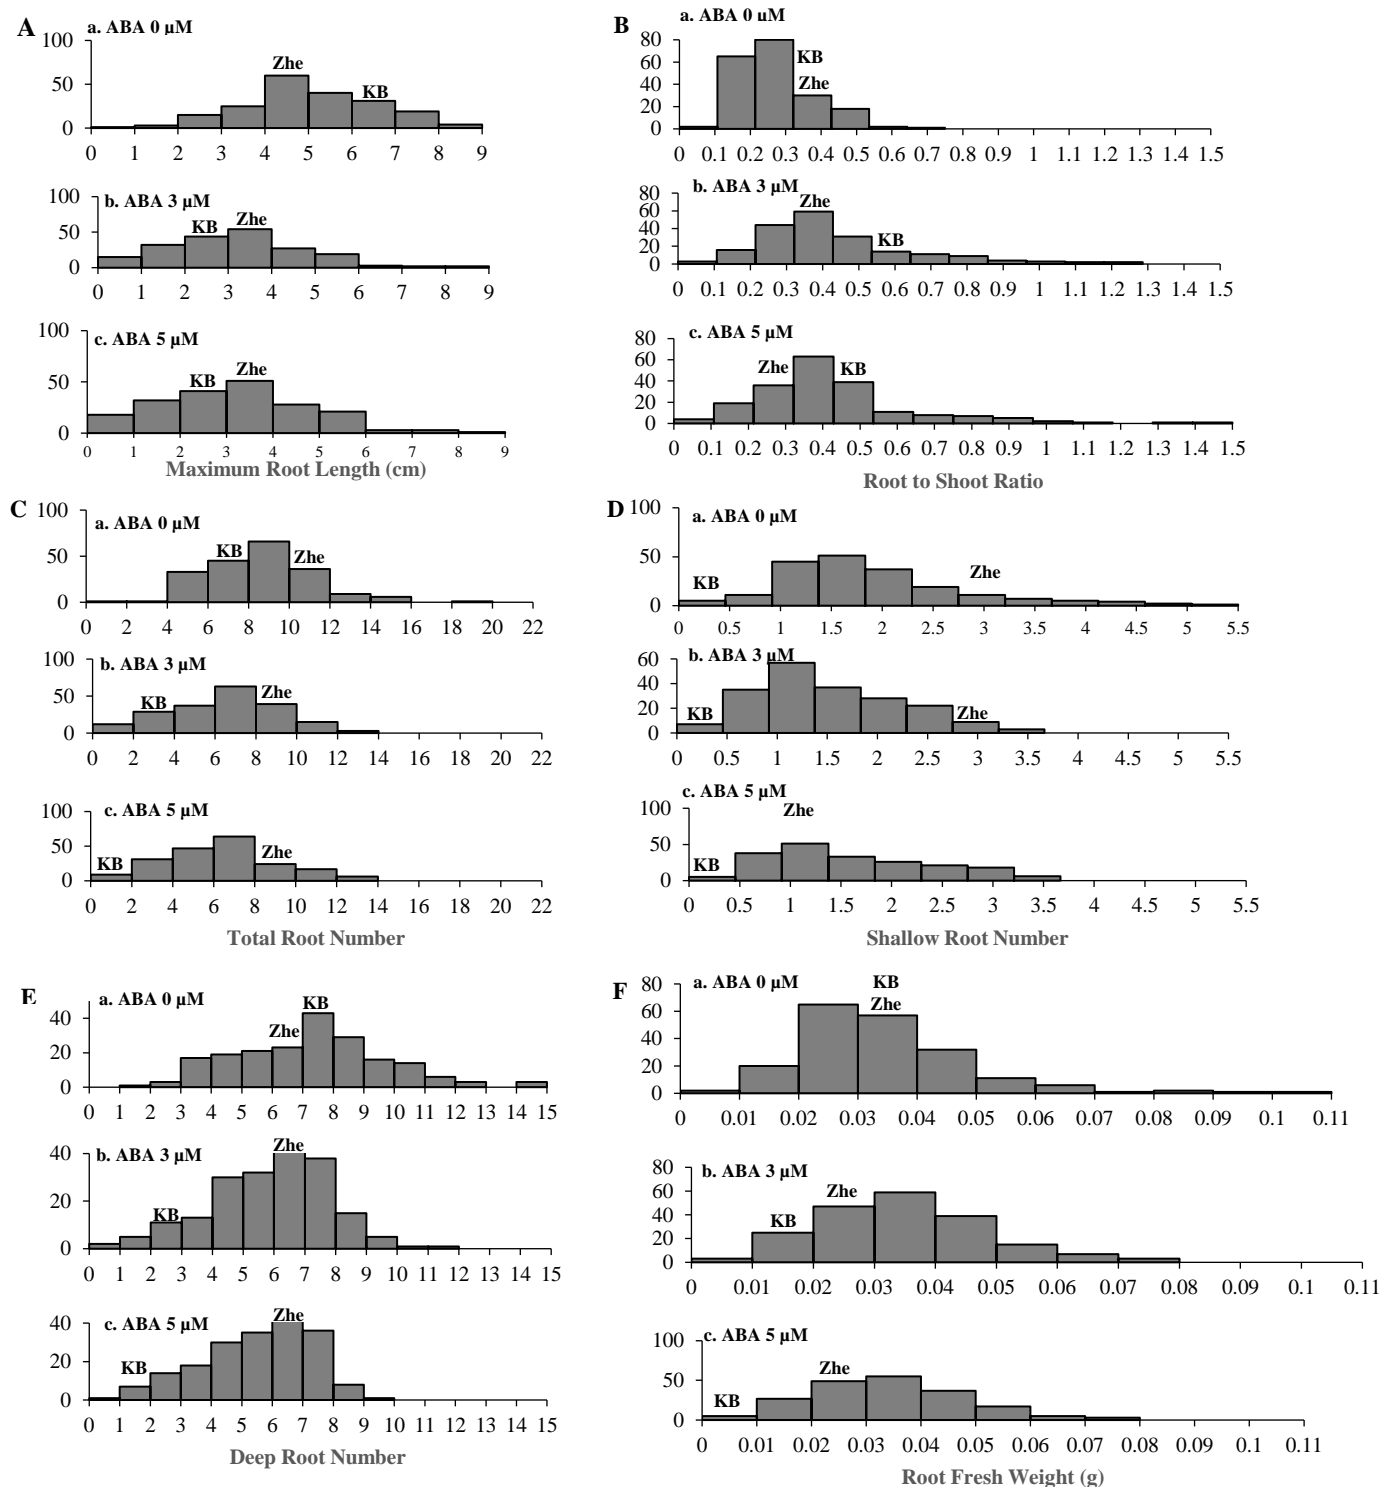

**Supplementary Figure 2.** Frequency distribution of root length (A), root to shoot ratio (B), total root number (C), shallow root number (D), deep root number (E), and root fresh weight (F) under control (ABA 0  $\mu\text{M}$ ) (a), ABA 3  $\mu\text{M}$  (b), and ABA 5  $\mu\text{M}$  (c)
