# Supplementary material for: QTLs and Candidate Loci Associated with Drought Tolerance Traits of Kaybonnet x ZHE733 Recombinant Inbred Lines Rice Population
Source: MDPI journal article supplement (doi:10.3390/ijms242015167), 2023-10-14
Supplement: s1 [file s1]

**Table S1.** The average and range values of morphological traits of K/Z RIL population

| Traits               | Treatments | Kaybonnet  | ZHE733     | K/Z RIL Population |          |
|----------------------|------------|------------|------------|--------------------|----------|
|                      |            |            |            | Average            | Range    |
| Plant height (cm)    | WW         | 98 ± 0.3   | 51 ± 0.1   | 60.03 ± 0.3        | 28 - 98  |
|                      | DS         | 84 ± 0.2   | 31 ± 0.1   | 29.99 ± 0.4        | 10 - 73  |
| Tiller number        | WW         | 5 ± 0.2    | 8 ± 0.3    | 8.11 ± 0.1         | 3 - 22   |
|                      | DS         | 4 ± 0.1    | 7 ± 0.3    | 6.98 ± 0.2         | 2 - 19   |
| Heading day (day)    | -          | 91 ± 0.3   | 71 ± 0.1   | 87 ± 0.1           | 65 - 109 |
| Flag leaf width (cm) | DS         | 1.7 ± 0.02 | 1.3 ± 0.02 | 1.2 ± 0.3          | 0.7 - 2  |
| Leaf rolling score   | DS         | 2 ± 0.1    | 4 ± 0.2    | 2.8 ± 0.2          | 1 - 4    |
