# Supplementary material for: QTLs and Candidate Loci Associated with Drought Tolerance Traits of Kaybonnet x ZHE733 Recombinant Inbred Lines Rice Population
Source: MDPI journal article supplement (doi:10.3390/ijms242015167), 2023-10-14
Supplement: s1 [file s1]

**Table S4.** Candidate drought resistance genes within QTL regions for generating gene expression with RT-qPCR

| No.                                                                                                                    | Genes          | Forward                      | Reverse                       |
|------------------------------------------------------------------------------------------------------------------------|----------------|------------------------------|-------------------------------|
| <b>Internal control gene</b>                                                                                           |                |                              |                               |
| 1                                                                                                                      | Ubiquitin      | 5'-CGCAAGTACAACCAGGACAA-3'   | 5'-GCTGTGACCACACTTCTTCTT-3'   |
| <b>Candidate drought resistance genes within QTL regions with known annotations to be responsive to drought stress</b> |                |                              |                               |
| 1                                                                                                                      | LOC_Os01g66270 | 5'-GGATGTACGGCGCTCAC-3'      | 5'-ACATCAGGATCTCCATGTCATC-3'  |
| 2                                                                                                                      | LOC_Os02g54160 | 5'-GCTCCTATTGAGGACCCTATCA-3' | 5'-GGTATCATTCTCCCAGCCAAAG-3'  |
| 3                                                                                                                      | LOC_Os03g56280 | 5'-TGCTGGCGTTGTGGAAT-3'      | 5'-GCACGACCTAACCTCACTTT-3'    |
| 4                                                                                                                      | LOC_Os04g44190 | 5'-GAGGAGGACTTGGTGATTGATG-3' | 5'-GCCGAGGTCAATGTACAAGAA-3'   |
| 5                                                                                                                      | LOC_Os05g49010 | 5'-CCGCGACGAACCTGTGAT-3'     | 5'-GATCACTCCTGCGTCACCTTT-3'   |
| 6                                                                                                                      | LOC_Os05g49210 | 5'-CTTCAAGACGGCGGAGAAG-3'    | 5'-CCGACGAGCAATCCCATATT-3'    |
| 7                                                                                                                      | LOC_Os05g49240 | 5'-GCCACTACGAAGACCTCAC-3'    | 5'-TCCAGTATCCCTGCGTCT-3'      |
| 8                                                                                                                      | LOC_Os06g49080 | 5'-GTCAACCATTTGGGAGCTTTC-3'  | 5'-GGAGGAGTTACCATCCCATTAAG-3' |
| 9                                                                                                                      | LOC_Os07g02520 | 5'-CACAAGGTACTGGTGTTCTC-3'   | 5'-CGTTGCTGCTGTAGATGTAGT-3'   |
| 10                                                                                                                     | LOC_Os08g06344 | 5'-CTGTTCCAGAGGACCTGAAAG-3'  | 5'-CGCTTCCACCATATCCTGTT-3'    |
| 11                                                                                                                     | LOC_Os09g08120 | 5'-GGGAGCGACGACGTAAAG-3'     | 5'-GTCGGCTCCAACCTCCAAC-3'     |
| 12                                                                                                                     | LOC_Os10g41460 | 5'-CTACCGCGATAGGTGGGA-3'     | 5'-ATCTTGTGGCGGCACTG-3'       |
| 13                                                                                                                     | LOC_Os11g30760 | 5'-CCGTACAGTTCCGCTAC-3'      | 5'-TGGACGATCGATGATGTTG-3'     |
| 14                                                                                                                     | LOC_Os12g02700 | 5'-CACCCCTTCAGAGCCCATAA-3'   | 5'-GATGGCAAGGACGAGGAG-3'      |
| 15                                                                                                                     | LOC_Os12g29330 | 5'-GCTTGTGGTGCACTACCTC-3'    | 5'-TGAAGAAGTACCTCTCCTGCTC-3'  |
| <b>Candidate drought resistance genes from the traits with high LOD and PVE with unknown annotations</b>               |                |                              |                               |
| 1                                                                                                                      | LOC_Os02g44590 | 5'-GACGAGCACCTAATGAAGGAG-3'  | 5'-GCCGGCATCGTGTAGATAG-3'     |
| 2                                                                                                                      | LOC_Os02g44599 | 5'-CAACCTCGGCGATCTTCTG-3'    | 5'-GGACCTTCGCGTACATGG-3'      |
| 3                                                                                                                      | LOC_Os02g44610 | 5'-CATGAGAGAGACACTGCCATAG-3' | 5'-AAAGAGAAGTCGGCGATCTG-3'    |
| 4                                                                                                                      | LOC_Os02g44620 | 5'-TGATCTGTTCTTCGGTGGAAAG-3' | 5'-CCTAAGCAGGGCATGATTGT-3'    |
| 5                                                                                                                      | LOC_Os02g44630 | 5'-GGTCTTGGTGCTGAGATTGT-3'   | 5'-GTCCCTGGCATTCTCTTTG-3'     |
| 6                                                                                                                      | LOC_Os02g44642 | 5'-GACCTGAAACTACCGAACCTG-3'  | 5'-GTCCCTGAAGTCGCAAATCT-3'    |
| 7                                                                                                                      | LOC_Os10g07030 | 5'-ACAAGCACGCAAGCAGT-3'      | 5'-CCTCGTCAAGTCCTCCCT-3'      |
| 8                                                                                                                      | LOC_Os10g07040 | 5'-CAACGATCCTCGCCATCG-3'     | 5'-CGGTAAGGTGCTCGCTTT-3'      |
| 9                                                                                                                      | LOC_Os10g07050 | 5'-CAGCTGCCCATGCATCC-3'      | 5'-CGTCCTCTCTGTGCGATTT-3'     |
| 10                                                                                                                     | LOC_Os10g07060 | 5'-GGTCCCTTAGTCCATCAGATCA-3' | 5'-TACTGCCTGTTCCGTTCCCT-3'    |
| 11                                                                                                                     | LOC_Os10g07080 | 5'-CCCGCACCTAGCATCTTG-3'     | 5'-GCCGGATGTCGACGTATG-3'      |
