# Supplementary material for: QTLs and Candidate Loci Associated with Drought Tolerance Traits of Kaybonnet x ZHE733 Recombinant Inbred Lines Rice Population
Source: MDPI journal article supplement (doi:10.3390/ijms242015167), 2023-10-14
Supplement: s1 [file s1]

**Table S2.** The average and range values of root architectural traits of K/Z RIL population under ABA conditions

| Traits              | Treatments    | Kaybonnet         | ZHE733            | K/Z RIL Population |                |
|---------------------|---------------|-------------------|-------------------|--------------------|----------------|
|                     |               |                   |                   | Average            | Range          |
| Root length (cm)    | ABA 0 $\mu$ M | 6.570 $\pm$ 0.2   | 4.611 $\pm$ 0.1   | 4.428 $\pm$ 0.2    | 0.500 - 8.933  |
|                     | ABA 3 $\mu$ M | 2.500 $\pm$ 0.2   | 3.800 $\pm$ 0.2   | 3.600 $\pm$ 0.3    | 0.094 - 8.651  |
|                     | ABA 5 $\mu$ M | 2.050 $\pm$ 0.1   | 3.678 $\pm$ 0.1   | 3.491 $\pm$ 0.3    | 0.100 - 8.367  |
| Root to shoot ratio | ABA 0 $\mu$ M | 0.363 $\pm$ 0.07  | 0.324 $\pm$ 0.05  | 0.259 $\pm$ 0.08   | 0.079 - 0.669  |
|                     | ABA 3 $\mu$ M | 0.587 $\pm$ 0.03  | 0.303 $\pm$ 0.08  | 0.336 $\pm$ 0.09   | 0.013 - 1.216  |
|                     | ABA 5 $\mu$ M | 0.432 $\pm$ 0.06  | 0.298 $\pm$ 0.05  | 0.335 $\pm$ 0.03   | 0.014 - 1.411  |
| Total root number   | ABA 0 $\mu$ M | 6.600 $\pm$ 0.2   | 10.222 $\pm$ 0.5  | 8.362 $\pm$ 0.4    | 1.667 - 18.667 |
|                     | ABA 3 $\mu$ M | 2.500 $\pm$ 0.1   | 9.667 $\pm$ 0.3   | 6.986 $\pm$ 0.2    | 1.000 - 11.333 |
|                     | ABA 5 $\mu$ M | 1.750 $\pm$ 0.2   | 9.200 $\pm$ 0.7   | 6.600 $\pm$ 0.5    | 1.000 - 12.333 |
| Shallow root number | ABA 0 $\mu$ M | 0.200 $\pm$ 0.05  | 3.333 $\pm$ 0.1   | 1.649 $\pm$ 0.1    | 0.000 - 5.667  |
|                     | ABA 3 $\mu$ M | 0.000 $\pm$ 0.00  | 3.177 $\pm$ 0.2   | 1.092 $\pm$ 0.1    | 0.000 - 3.540  |
|                     | ABA 5 $\mu$ M | 0.000 $\pm$ 0.00  | 3.005 $\pm$ 0.2   | 1.047 $\pm$ 0.3    | 0.000 - 3.667  |
| Deep root number    | ABA 0 $\mu$ M | 7.400 $\pm$ 0.4   | 6.889 $\pm$ 0.3   | 7.043 $\pm$ 0.5    | 1.667 - 14.667 |
|                     | ABA 3 $\mu$ M | 2.500 $\pm$ 0.2   | 6.490 $\pm$ 0.4   | 6.391 $\pm$ 0.3    | 0.000 - 11.000 |
|                     | ABA 5 $\mu$ M | 1.750 $\pm$ 0.1   | 6.195 $\pm$ 0.2   | 6.155 $\pm$ 0.2    | 0.000 - 9.333  |
| Root fresh weight   | ABA 0 $\mu$ M | 0.032 $\pm$ 0.01  | 0.031 $\pm$ 0.02  | 0.034 $\pm$ 0.02   | 0.001 - 0.114  |
|                     | ABA 3 $\mu$ M | 0.016 $\pm$ 0.01  | 0.029 $\pm$ 0.01  | 0.033 $\pm$ 0.01   | 0.000 - 0.083  |
|                     | ABA 5 $\mu$ M | 0.005 $\pm$ 0.002 | 0.027 $\pm$ 0.001 | 0.026 $\pm$ 0.001  | 0.000 - 0.078  |
