# Supplementary material for: QTLs and Candidate Loci Associated with Drought Tolerance Traits of Kaybonnet x ZHE733 Recombinant Inbred Lines Rice Population
Source: MDPI journal article supplement (doi:10.3390/ijms242015167), 2023-10-14
Supplement: s1 [file s1]

**Table S6.** Phenotypic correlation between grain yield components under WW and DS conditions, and root architectural traits under ABA conditions of the K/Z RIL population

|               | FG-WW  | FG-DS  | RL-A0  | RL-A3  | RL-A5  | RSR-A0 | RSR-A3 | RSR-A5 | TRN-A0 | TRN-A3 | TRN-A5 | SRN-A0 | SRN-A3 | SRN-A5 | DRN-A0 | DRN-A3 | DRN-A5 | RFW-A0 | RFW-A3 |
|---------------|--------|--------|--------|--------|--------|--------|--------|--------|--------|--------|--------|--------|--------|--------|--------|--------|--------|--------|--------|
| <b>FG-DS</b>  | 0.376  |        |        |        |        |        |        |        |        |        |        |        |        |        |        |        |        |        |        |
| <b>RL-A0</b>  | -0.087 | 0.086  |        |        |        |        |        |        |        |        |        |        |        |        |        |        |        |        |        |
| <b>RL-A3</b>  | -0.062 | 0.236  | 0.644  |        |        |        |        |        |        |        |        |        |        |        |        |        |        |        |        |
| <b>RL-A5</b>  | -0.075 | 0.220  | 0.619  | 0.931  |        |        |        |        |        |        |        |        |        |        |        |        |        |        |        |
| <b>RSR-A0</b> | -0.030 | 0.032  | 0.722  | 0.503  | 0.492  |        |        |        |        |        |        |        |        |        |        |        |        |        |        |
| <b>RSR-A3</b> | -0.032 | 0.128  | 0.566  | 0.665  | 0.640  | 0.447  |        |        |        |        |        |        |        |        |        |        |        |        |        |
| <b>RSR-A5</b> | -0.051 | 0.198  | 0.526  | 0.624  | 0.715  | 0.376  | 0.764  |        |        |        |        |        |        |        |        |        |        |        |        |
| <b>TRN-A0</b> | -0.079 | 0.078  | 0.305  | 0.217  | 0.237  | 0.087  | 0.428  | 0.371  |        |        |        |        |        |        |        |        |        |        |        |
| <b>TRN-A3</b> | -0.046 | 0.246  | 0.495  | 0.578  | 0.572  | 0.412  | 0.334  | 0.390  | 0.380  |        |        |        |        |        |        |        |        |        |        |
| <b>TRN-A5</b> | -0.029 | 0.253  | 0.418  | 0.525  | 0.531  | 0.369  | 0.388  | 0.309  | 0.430  | 0.785  |        |        |        |        |        |        |        |        |        |
| <b>SRN-A0</b> | -0.020 | -0.092 | -0.360 | -0.288 | -0.249 | -0.296 | -0.185 | -0.152 | 0.123  | -0.188 | -0.057 |        |        |        |        |        |        |        |        |
| <b>SRN-A3</b> | -0.082 | 0.017  | 0.080  | -0.075 | -0.096 | 0.188  | -0.145 | -0.156 | 0.035  | 0.326  | 0.265  | 0.111  |        |        |        |        |        |        |        |
| <b>SRN-A5</b> | -0.058 | 0.069  | 0.119  | -0.058 | -0.061 | 0.028  | 0.020  | -0.067 | 0.155  | 0.158  | 0.382  | 0.174  | 0.431  |        |        |        |        |        |        |
| <b>DRN-A0</b> | -0.063 | 0.135  | 0.462  | 0.348  | 0.350  | 0.221  | 0.504  | 0.439  | 0.901  | 0.461  | 0.460  | -0.286 | -0.024 | 0.093  |        |        |        |        |        |
| <b>DRN-A3</b> | -0.021 | 0.234  | 0.476  | 0.635  | 0.642  | 0.338  | 0.414  | 0.477  | 0.387  | 0.889  | 0.695  | -0.246 | -0.138 | -0.048 | 0.498  |        |        |        |        |
| <b>DRN-A5</b> | -0.004 | 0.235  | 0.398  | 0.587  | 0.598  | 0.385  | 0.409  | 0.358  | 0.398  | 0.778  | 0.921  | -0.130 | 0.109  | -0.006 | 0.454  | 0.767  |        |        |        |
| <b>RFW-A0</b> | -0.029 | 0.033  | 0.501  | 0.360  | 0.341  | 0.150  | 0.284  | 0.228  | 0.387  | 0.253  | 0.227  | -0.150 | -0.011 | 0.042  | 0.438  | 0.272  | 0.225  |        |        |
| <b>RFW-A3</b> | 0.066  | 0.267  | 0.276  | 0.484  | 0.448  | 0.137  | 0.143  | 0.192  | 0.128  | 0.579  | 0.463  | -0.169 | 0.059  | -0.039 | 0.215  | 0.567  | 0.500  | 0.289  |        |
| <b>RFW-A5</b> | 0.052  | 0.212  | 0.298  | 0.459  | 0.478  | 0.210  | 0.144  | 0.176  | 0.134  | 0.568  | 0.598  | -0.137 | 0.111  | 0.078  | 0.205  | 0.536  | 0.606  | 0.286  | 0.858  |

\* FG-WW, Filled grain per panicle number under WW; FG-DS, Filled grain per panicle number under DS; RL-A0, maximum root length under ABA 0  $\mu$ M; RL-A3, maximum root length under ABA 3  $\mu$ M; RL-A5, maximum root length under ABA 5  $\mu$ M; RSR-A0, root to shoot ratio under ABA 0  $\mu$ M; RSR-A3, root to shoot ratio under ABA 3  $\mu$ M; RSR-A5, root to shoot ratio under ABA 5  $\mu$ M; TRN-A0, total root number under ABA 0  $\mu$ M; TRN-A3, total root number under ABA 3  $\mu$ M; TRN-A5, total root number under ABA 5  $\mu$ M; SRN-A0, number of roots with a shallow angle (0-45°) under ABA 0  $\mu$ M; SRN-A3, number of roots with a shallow angle (0-45°) under ABA 3  $\mu$ M; SRN-A5, number of roots with a shallow angle (0-45°) under ABA 5  $\mu$ M; DRN-A0, number of roots with a deep angle (45-90°) under ABA 0  $\mu$ M; DRN-A3, number of roots with a deep angle (45-90°) under ABA 3  $\mu$ M; DRN-A5, number of roots with a deep angle (45-90°) under ABA 5  $\mu$ M; RFW-A0, root fresh weight under ABA 0  $\mu$ M; RFW-A3, root fresh weight under ABA 3  $\mu$ M; RFW-A5, root fresh weight under ABA 5  $\mu$ M.
