# Supplementary material for: QTLs and Candidate Loci Associated with Drought Tolerance Traits of Kaybonnet x ZHE733 Recombinant Inbred Lines Rice Population
Source: MDPI journal article supplement (doi:10.3390/ijms242015167), 2023-10-14
Supplement: s1 [file s1]

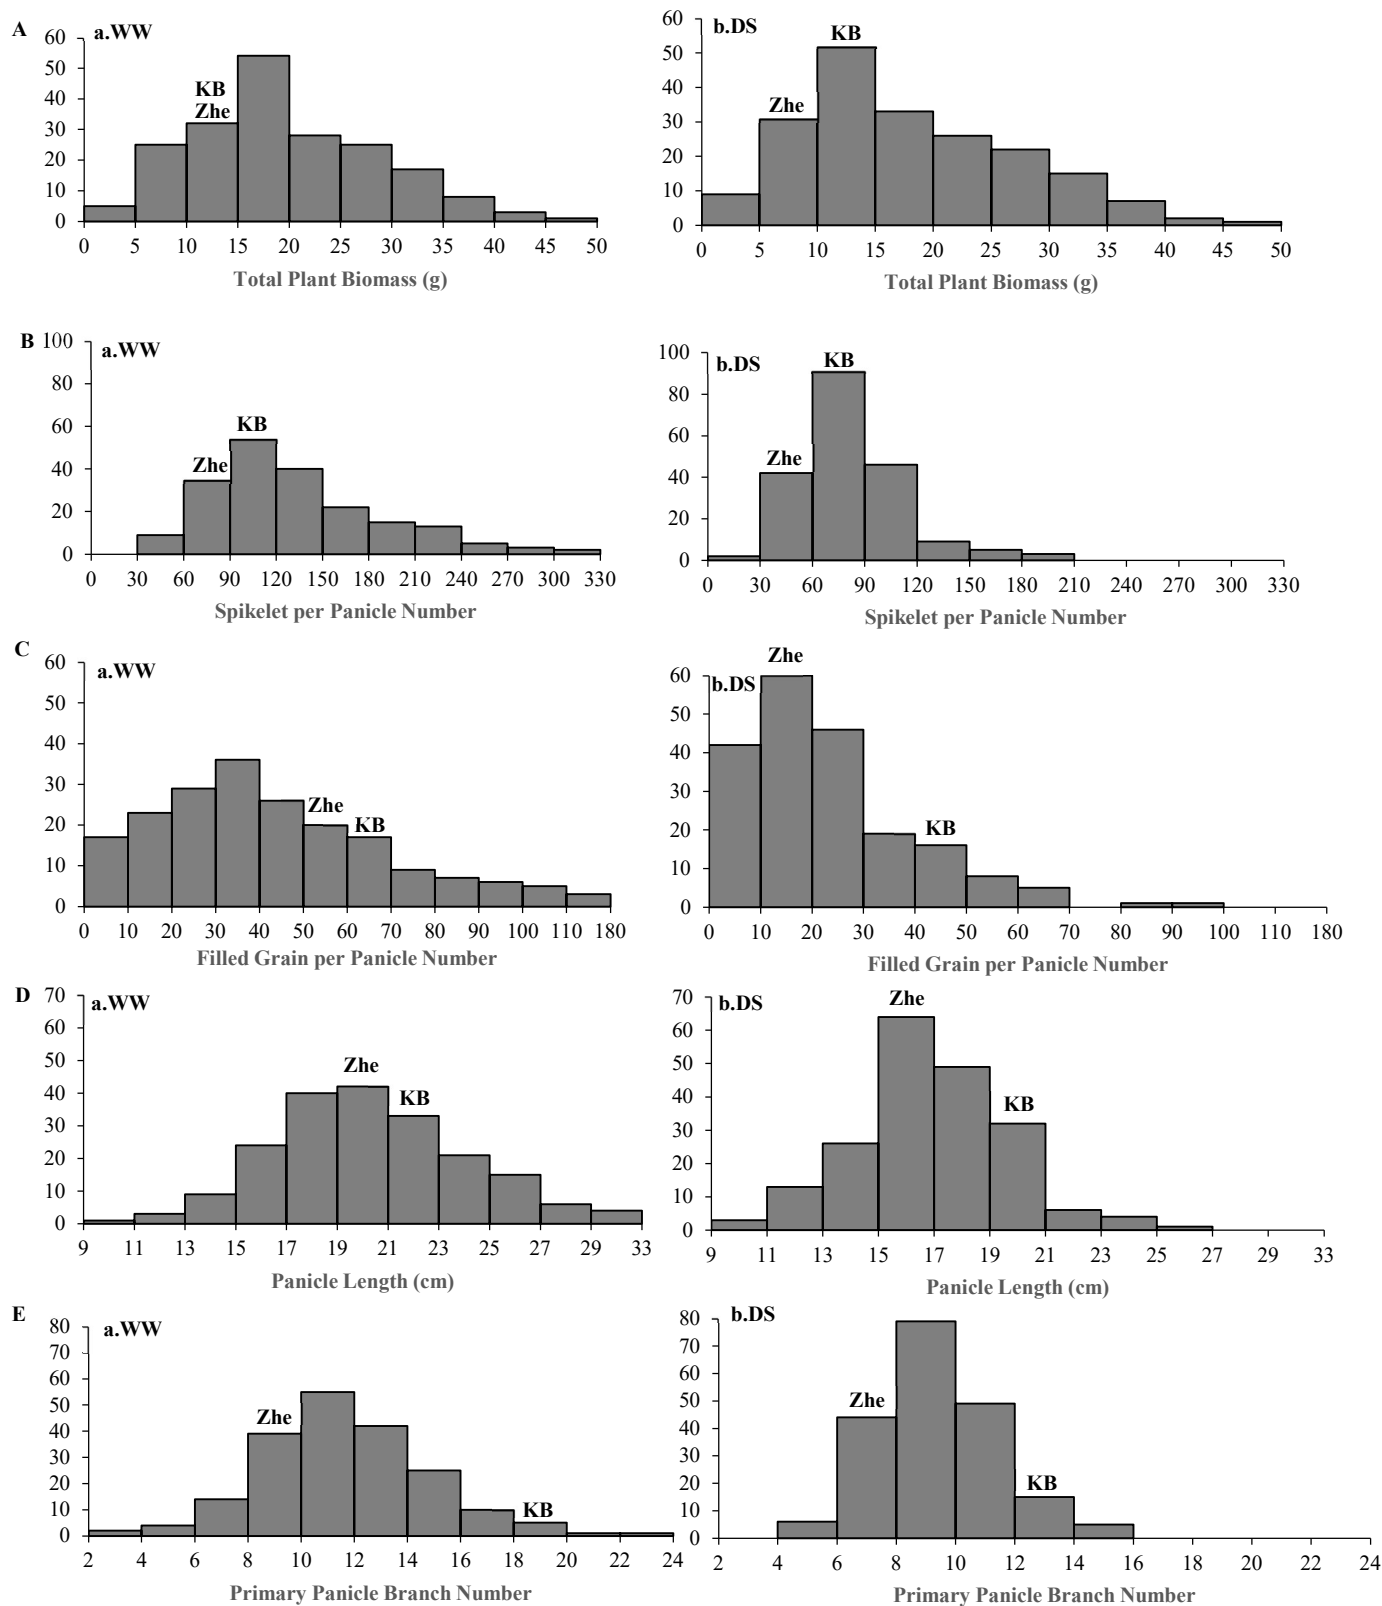

**Supplementary Figure 1.** Frequency distribution of total plant biomass (A), spikelet per panicle number (B), filled grain per panicle number (C), panicle length (D), and primary panicle branch number (E) under WW (a) and DS (b)

conditions
